# Supplementary material
Source: publisher figshare collection journal article supplement (https://gsajournals.figshare.com/ndownloader/files/17774276)
Supplement: Supplementary file 1 [file 17774276]

## Sheet: Sheet1
Supplemental Table S1. Population structure analysis of the sorghum diversity panel.
Included in the table are the first two principal components (PCs) calculated from the SNP genotype matrix (PC1 and PC2), assignment value (Q) for each subpopulation (Subpopulation 1 to 4), sorghum race classification based on passport information from the germplasm resources information network (Race-GRIN), subpopulation with the highest assignment value (K), greatest Q assignment value, and the…
ID	PC1	PC2	Subpopulation1	Subpopulation2	Subpopulation3	Subpopulation4	Race - GRIN	K	Q-value	Category
PI152730	0.0136	0.0212	0.0198	0	0.5507	0.4294	Caudatum	3	0.5507	Admixed
PI221662	-0.0431	0.0208	1	0	0	0	Durra	1	1	Subpop.1
PI156143	-0.0167	0.0067	0.3706	0	0.5157	0.1137	NA	3	0.5157	Admixed
PI148084	0.0207	-0.0457	0	1	0	0	Durra	2	1	Subpop.2
PI147837	0.0599	0.064	0	0	0	1	NA	4	1	Subpop.4
PI152705	-0.0109	-0.008	0.0029	0.0656	0.9315	0	Caudatum	3	0.9315	Subpop.3
PI152636	-0.0109	-0.008	0.0033	0.0633	0.9334	0	Caudatum	3	0.9334	Subpop.3
PI453346	0.0244	-0.0493	0	1	0	0	NA	2	1	Subpop.2
PI452669	0	0	0.0115	0.9653	0.0116	0.0116	NA	2	0.9653	Subpop.2
PI453217	0.0019	-0.0143	0.0074	0.518	0.4625	0.0121	NA	2	0.518	Admixed
PI453233	0.0201	0.0217	0	0.0316	0.5085	0.4599	NA	3	0.5085	Admixed
PI453339	0.0303	-0.0151	0	0.7134	0	0.2866	NA	2	0.7134	Admixed
PI453354	0.0218	-0.0426	0	0.9933	0	0.0067	NA	2	0.9933	Subpop.2
PI453221	0.017	-0.0396	0	1	0	0	NA	2	1	Subpop.2
PI525625	0.0113	-0.0312	0.1175	0.8566	0	0.026	NA	2	0.8566	Subpop.2
PI453219	0	0	0.0091	0.0093	0.9724	0.0092	NA	3	0.9724	Subpop.3
PI453341	0.0219	-0.0465	0	1	0	0	NA	2	1	Subpop.2
PI452567	0	0	0.25	0.25	0.25	0.25	NA	Admixed	0.25	Admixed
PI453349	0.0212	-0.0454	0	1	0	0	NA	2	1	Subpop.2
PI562732	0.0214	-0.0444	0	1	0	0	Durra-caudatum	2	1	Subpop.2
PI453234	0.0251	0.0273	0	0	0.3964	0.6036	NA	4	0.6036	Admixed
PI525728	-0.0409	0.0161	1	0	0	0	NA	1	1	Subpop.1
PI452563	0	0	0.938	0.0208	0.0207	0.0206	NA	1	0.938	Subpop.1
PI152736B	-0.0034	-0.0094	0.0009	0.2264	0.7727	0	NA	3	0.7727	Admixed
PI457135	0.0196	-0.0424	0	0.9576	0.0424	0	NA	2	0.9576	Subpop.2
PI562997	-0.0277	0.01	0.7011	0	0.2989	0	Guinea-caudatum	1	0.7011	Admixed
PI521150	-0.0165	-0.0027	0	0	1	0	NA	3	1	Subpop.3
PI521069	-0.0139	-0.0035	0	0	1	0	NA	3	1	Subpop.3
PI453336	0.0213	-0.0448	0	1	0	0	NA	2	1	Subpop.2
PI454241	0.0227	-0.0476	0	1	0	0	NA	2	1	Subpop.2
NSL50740	-0.044	0.02	1	0	0	0	NA	1	1	Subpop.1
PI457455	0.0536	0.0598	0	0	0	1	NA	4	1	Subpop.4
PI454468	0.0243	-0.0488	0	1	0	0	NA	2	1	Subpop.2
PI452659	0.0204	0.0161	0	0.1525	0.4058	0.4417	NA	4	0.4417	Admixed
PI456419	0.0212	-0.0436	0	1	0	0	NA	2	1	Subpop.2
PI452665	0.0229	-0.0519	0	1	0	0	NA	2	1	Subpop.2
PI271236	-0.0419	0.0183	1	0	0	0	NA	1	1	Subpop.1
NSL365694	-0.0292	0.0135	0.546	0	0.3996	0.0544	Kafir	1	0.546	Admixed
PI152736A	-0.0028	-0.0128	0.0102	0.267	0.6973	0.0254	NA	3	0.6973	Admixed
PI151198	0.0496	0.0517	0	0	0	1	Durra	4	1	Subpop.4
PI453363	0.0211	-0.0408	0	1	0	0	NA	2	1	Subpop.2
PI521155	-0.0161	-0.0048	0	0	1	0	NA	3	1	Subpop.3
PI282871	0.0197	0.0437	0.1811	0	0.1987	0.6201	NA	4	0.6201	Admixed
PI453463	0.0183	-0.041	0	1	0	0	NA	2	1	Subpop.2
PI521175	-0.0149	-0.0041	0	0	1	0	NA	3	1	Subpop.3
NSL365697	-0.0103	-0.0072	0.0025	0	0.9875	0.01	NA	3	0.9875	Subpop.3
PI452511	0.0339	0.006	0	0.4948	0	0.5052	NA	4	0.5052	Admixed
PI329444	0.0246	-0.0159	0	0.7502	0	0.2498	NA	2	0.7502	Admixed
PI452668	0.0524	0.0425	0	0.1585	0	0.8415	NA	4	0.8415	Subpop.4
PI329351	-0.0033	-0.0061	0	0.1337	0.8663	0	NA	3	0.8663	Subpop.3
PI453035	0.0225	-0.0476	0	1	0	0	NA	2	1	Subpop.2
PI452656	0.0284	0.0009	0	0.4546	0.1678	0.3776	NA	2	0.4546	Admixed
PI329646	0.0556	0.0599	0	0	0	1	NA	4	1	Subpop.4
PI568755	-0.0027	-0.0114	0	0.3797	0.6203	0	NA	3	0.6203	Admixed
PI521086	-0.016	-0.0044	0	0	1	0	NA	3	1	Subpop.3
NSL54591	0.0138	-0.0429	0	1	0	0	Durra	2	1	Subpop.2
PI521198	-0.0132	-0.0039	0	0	1	0	NA	3	1	Subpop.3
PI452529	0.0002	-0.0001	0.0013	0.7988	0.0013	0.1987	NA	2	0.7988	Admixed
PI453238	0.0369	0.0383	0	0.0589	0	0.9411	NA	4	0.9411	Subpop.4
PI514344	-0.0374	0.0155	1	0	0	0	NA	1	1	Subpop.1
PI520940	-0.0143	-0.0045	0	0	1	0	NA	3	1	Subpop.3
PI329301	0	0	0.9682	0.0107	0.0106	0.0105	NA	1	0.9682	Subpop.1
PI585966	-0.0547	0.0305	1	0	0	0	Guinea	1	1	Subpop.1
PI452756	0.0248	-0.0294	0	0.8778	0	0.1222	NA	2	0.8778	Subpop.2
PI452625	0.0223	-0.0491	0	1	0	0	NA	2	1	Subpop.2
PI506030B	-0.034	0.009	0.6817	0	0.3183	0	NA	1	0.6817	Admixed
PI452525	0.0165	-0.0352	0.083	0.8345	0	0.0825	NA	2	0.8345	Subpop.2
PI291089	0.0428	0.0394	0	0.0717	0	0.9283	NA	4	0.9283	Subpop.4
PI514165	-0.0535	0.0282	1	0	0	0	NA	1	1	Subpop.1
PI457183A	0.0176	-0.0403	0	1	0	0	NA	2	1	Subpop.2
PI524933	-0.0206	0.0048	0.0668	0	0.9332	0	NA	3	0.9332	Subpop.3
PI453269	0.038	0.0079	0	0.4796	0	0.5204	NA	4	0.5204	Admixed
PI453021	-0.0061	-0.0088	0	0.1382	0.8618	0	NA	3	0.8618	Subpop.3
PI329633	0	0	0.9262	0.0246	0.0246	0.0246	NA	1	0.9262	Subpop.1
PI563039	0.0537	0.0558	0	0	0	1	NA	4	1	Subpop.4
PI513901	-0.0492	0.027	1	0	0	0	NA	1	1	Subpop.1
NSL50614	-0.0388	0.0204	1	0	0	0	Guinea	1	1	Subpop.1
PI525855	-0.0472	0.0202	1	0	0	0	NA	1	1	Subpop.1
PI521048	-0.0141	0.001	0.0126	0	0.9873	0	NA	3	0.9873	Subpop.3
PI521290	-0.0154	-0.0023	0	0	1	0	Guinea-bicolor	3	1	Subpop.3
PI452533	0.0136	-0.0293	0	1	0	0	NA	2	1	Subpop.2
PI457092	0.0181	-0.0404	0	1	0	0	NA	2	1	Subpop.2
PI329286	0	0	0.0024	0.9926	0.0024	0.0025	NA	2	0.9926	Subpop.2
PI454584	0.0219	-0.0473	0	1	0	0	NA	2	1	Subpop.2
PI453433	0	0	0.0065	0.176	0.0066	0.811	NA	4	0.811	Subpop.4
PI452639	0.0247	-0.0518	0	1	0	0	NA	2	1	Subpop.2
PI452590	0.0248	-0.0518	0	1	0	0	NA	2	1	Subpop.2
PI453246	0.0211	-0.0441	0	1	0	0	NA	2	1	Subpop.2
PI452789	0.0258	0.0076	0	0.3651	0.1913	0.4436	NA	4	0.4436	Admixed
PI585454	-0.0348	0.0138	1	0	0	0	Guinea	1	1	Subpop.1
PI276853A	0.051	0.0321	0	0.2396	0	0.7604	Durra	4	0.7604	Admixed
PI514456	-0.0472	0.0203	1	0	0	0	Guinea	1	1	Subpop.1
PI267629	0.0477	0.0286	0	0.2989	0	0.7011	NA	4	0.7011	Admixed
PI514556	-0.036	0.0126	0.6861	0	0.3139	0	NA	1	0.6861	Admixed
PI585467	-0.0451	0.0245	1	0	0	0	Guinea	1	1	Subpop.1
PI453136	0.023	-0.0293	0	0.8925	0	0.1075	NA	2	0.8925	Subpop.2
PI514465	-0.0358	0.0248	0.7154	0.0205	0.1659	0.0981	NA	1	0.7154	Admixed
PI452982	0.019	-0.0446	0	1	0	0	NA	2	1	Subpop.2
PI453494	0.0214	-0.0304	0	0.9054	0	0.0946	NA	2	0.9054	Subpop.2
PI453146	0	0	0.25	0.25	0.25	0.25	NA	Admixed	0.25	Admixed
PI276829	0.0839	0.0856	0	0	0	1	NA	4	1	Subpop.4
PI452577	0.0227	-0.0469	0	1	0	0	NA	2	1	Subpop.2
PI329543	0.0412	0.0451	0	0	0	1	NA	4	1	Subpop.4
PI453490	0.0204	-0.0428	0	1	0	0	NA	2	1	Subpop.2
PI563216	-0.0153	-0.0028	0	0	1	0	NA	3	1	Subpop.3
PI455585	0.0216	-0.044	0	1	0	0	NA	2	1	Subpop.2
PI452845	0.0197	-0.0229	0	0.8314	0	0.1686	NA	2	0.8314	Subpop.2
PI524505	-0.0304	0.0093	0.6723	0	0.3277	0	NA	1	0.6723	Admixed
PI329554	0.0504	0.0515	0	0	0	1	NA	4	1	Subpop.4
PI453367	0.0081	-0.0175	0	1	0	0	NA	2	1	Subpop.2
PI452958	0.0241	-0.0315	0	0.8958	0	0.1041	NA	2	0.8958	Subpop.2
PI452850	0.0284	-0.033	0	0.8769	0	0.1231	NA	2	0.8769	Subpop.2
PI452851	0.029	-0.0345	0	0.8854	0	0.1146	NA	2	0.8854	Subpop.2
PI453115	0.0003	0.0001	0.0006	0.1095	0.2052	0.6846	NA	4	0.6846	Admixed
PI452990	0.0634	0.0661	0	0	0	1	NA	4	1	Subpop.4
PI329550	0.0553	0.0625	0	0	0	1	NA	4	1	Subpop.4
PI456431	0.0191	-0.04	0	1	0	0	NA	2	1	Subpop.2
PI514549	-0.0129	-0.0048	0	0	1	0	NA	3	1	Subpop.3
PI455852	0.0185	-0.0387	0	0.9591	0	0.0409	NA	2	0.9591	Subpop.2
PI525742	-0.0023	-0.0159	0.1388	0.4546	0.4066	0	NA	2	0.4546	Admixed
PI452658	0.052	0.0428	0	0.1577	0	0.8423	NA	4	0.8423	Subpop.4
PI452587	0.0217	-0.0429	0	1	0	0	NA	2	1	Subpop.2
PI271233	-0.0016	0.0073	0	0	0.8022	0.1977	NA	3	0.8022	Subpop.3
PI452844	0	0	0.0124	0.9621	0.0128	0.0127	NA	2	0.9621	Subpop.2
PI457169	0.0118	-0.0311	0	0.828	0.172	0	NA	2	0.828	Subpop.2
PI660580	-0.0162	0.0023	0.0144	0	0.9856	0	Caudatum	3	0.9856	Subpop.3
PI452640	0.0248	-0.0526	0	1	0	0	NA	2	1	Subpop.2
PI453145	0	0	0.0243	0.0248	0.0246	0.9263	NA	4	0.9263	Subpop.4
PI329723	-0.0052	-0.0114	0	0.1693	0.8307	0	NA	3	0.8307	Subpop.3
PI453393	0.0216	-0.0454	0	1	0	0	NA	2	1	Subpop.2
PI454131	0.0217	-0.0464	0	1	0	0	NA	2	1	Subpop.2
PI329860	-0.0067	-0.0051	0	0	1	0	NA	3	1	Subpop.3
PI329327	0.0477	0.0516	0	0	0	1	NA	4	1	Subpop.4
PI452534	0.0215	-0.0454	0	1	0	0	NA	2	1	Subpop.2
PI453245	0.0546	0.0596	0	0	0	1	NA	4	1	Subpop.4
PI510757	-0.0071	-0.0096	0	0.1673	0.8326	0.0001	Durra	3	0.8326	Subpop.3
PI452697	0.024	-0.0507	0	1	0	0	NA	2	1	Subpop.2
PI521094	-0.0152	-0.0047	0	0	1	0	NA	3	1	Subpop.3
PI452693	0.0245	-0.0509	0	1	0	0	NA	2	1	Subpop.2
PI453080	0.0202	-0.0405	0	1	0	0	NA	2	1	Subpop.2
PI525665	-0.0428	0.0173	1	0	0	0	NA	1	1	Subpop.1
PI452761	0	0	0.008	0.732	0.0081	0.2518	NA	2	0.732	Admixed
PI514497	-0.0444	0.0198	0.9805	0	0.0195	0	NA	1	0.9805	Subpop.1
PI514431	-0.03	0.0124	1	0	0	0	NA	1	1	Subpop.1
PI276781	0.0261	-0.0327	0	0.8852	0	0.1148	NA	2	0.8852	Subpop.2
PI452648	0.0256	-0.054	0	1	0	0	NA	2	1	Subpop.2
PI454494	0.0339	0.0091	0	0.4842	0	0.5158	NA	4	0.5158	Admixed
PI562981	-0.0501	0.0261	1	0	0	0	Guinea	1	1	Subpop.1
NSL50843	-0.0376	0.0188	0.9939	0	0	0.006	Guinea	1	0.9939	Subpop.1
PI453328	0.0421	0.0228	0	0.3435	0	0.6565	NA	4	0.6565	Admixed
PI453241	0.0378	0.0225	0	0.3086	0.0558	0.6356	NA	4	0.6356	Admixed
PI585948	-0.0361	0.0158	0.9951	0	0.0049	0	NA	1	0.9951	Subpop.1
PI452628	0.0232	-0.0529	0	1	0	0	NA	2	1	Subpop.2
PI514220	-0.0406	0.0216	1	0	0	0	NA	1	1	Subpop.1
PI329546	0.0305	0.0326	0	0.0391	0.1114	0.8495	NA	4	0.8495	Subpop.4
PI276816	0.0871	0.0865	0	0	0	1	Durra	4	1	Subpop.4
PI455621	0.0216	-0.0468	0	1	0	0	NA	2	1	Subpop.2
PI329727	0.0232	-0.0486	0	1	0	0	NA	2	1	Subpop.2
PI452662	0.0485	0.0272	0	0.301	0	0.699	NA	4	0.699	Admixed
PI585608	-0.0188	0.0026	0	0	1	0	Caudatum	3	1	Subpop.3
PI520982	-0.0139	-0.0049	0	0	1	0	NA	3	1	Subpop.3
PI514139	-0.0512	0.0269	1	0	0	0	NA	1	1	Subpop.1
PI453330	0.0218	-0.0401	0	0.9768	0	0.0232	NA	2	0.9768	Subpop.2
PI585406	-0.0295	0.0284	0.8088	0	0	0.1912	Guinea	1	0.8088	Subpop.1
PI453335	0.0189	-0.0409	0	1	0	0	NA	2	1	Subpop.2
PI453086	0	0	0.0365	0.0382	0.0373	0.888	NA	4	0.888	Subpop.4
PI563021	-0.0458	0.024	1	0	0	0	Guinea	1	1	Subpop.1
PI329905	0.0189	0.0502	0.365	0	0	0.635	NA	4	0.635	Admixed
PI453162	-0.0077	-0.0064	0	0.081	0.919	0	NA	3	0.919	Subpop.3
PI570085	-0.0186	0.0013	0.0762	0	0.9238	0	Guinea-caudatum	3	0.9238	Subpop.3
PI524916	-0.0212	0.0028	0	0	1	0	NA	3	1	Subpop.3
PI573193	-0.0139	-0.0082	0.0678	0	0.9322	0	Caudatum	3	0.9322	Subpop.3
PI585561	0.0243	0.0363	0.0238	0	0.3562	0.62	NA	4	0.62	Admixed
PI525651	0.0111	-0.0286	0	0.8535	0.1465	0	NA	2	0.8535	Subpop.2
PI453290	0.025	-0.023	0	0.8171	0	0.1829	NA	2	0.8171	Subpop.2
PI513913	-0.0495	0.0266	1	0	0	0	NA	1	1	Subpop.1
PI453056	0.0201	-0.0174	0	0.7671	0	0.2329	NA	2	0.7671	Admixed
PI453224	0.0218	-0.0469	0	1	0	0	NA	2	1	Subpop.2
PI453183	0	0	0.25	0.25	0.25	0.25	NA	Admixed	0.25	Admixed
PI452940	0.0527	0.0589	0	0	0	1	NA	4	1	Subpop.4
PI329326	0	0	0.0296	0.0301	0.0293	0.911	NA	4	0.911	Subpop.4
PI329569	0.0172	-0.0368	0	1	0	0	NA	2	1	Subpop.2
PI525835	-0.0438	0.0192	1	0	0	0	NA	1	1	Subpop.1
PI330969	-0.0129	0.001	0	0	1	0	NA	3	1	Subpop.3
PI452808	0.0115	-0.0168	0	0.4995	0.382	0.1185	NA	2	0.4995	Admixed
PI452713	0.0143	-0.0376	0	0.9621	0	0.0379	NA	2	0.9621	Subpop.2
PI329510	0.0253	-0.0334	0	0.8992	0	0.1008	NA	2	0.8992	Subpop.2
PI147939	0.0479	0.0554	0	0	0	1	Durra	4	1	Subpop.4
PI267364	-0.0082	0.0084	0.5293	0.2832	0	0.1874	NA	1	0.5293	Admixed
PI452943	0.0525	0.0483	0	0.0957	0	0.9043	NA	4	0.9043	Subpop.4
PI563186	-0.014	-0.0043	0	0	1	0	NA	3	1	Subpop.3
PI452930	0.0368	0.0305	0	0.1332	0.167	0.6998	NA	4	0.6998	Admixed
NSL55345B	0.0114	-0.0329	0	0.9055	0.0945	0	NA	2	0.9055	Subpop.2
PI520990	-0.0155	-0.0031	0	0	1	0	NA	3	1	Subpop.3
PI329637	0.0082	0.0106	0	0.0549	0.6464	0.2987	NA	3	0.6464	Admixed
NSL54779	0.0125	-0.0387	0.003	0.9039	0.0931	0	Durra	2	0.9039	Subpop.2
PI525653	-0.0452	0.0168	1	0	0	0	NA	1	1	Subpop.1
PI329518	0.0479	0.0504	0	0	0	1	NA	4	1	Subpop.4
PI453081	0.0193	-0.037	0	0.9862	0	0.0138	NA	2	0.9862	Subpop.2
PI462095	0.0631	0.0672	0	0	0	1	NA	4	1	Subpop.4
PI570090	-0.016	0.0026	0.0822	0	0.9178	0	Guinea-caudatum	3	0.9178	Subpop.3
PI152702	-0.0082	-0.0085	0.0045	0	0.9849	0.0106	Caudatum	3	0.9849	Subpop.3
PI525822	-0.0362	0.0138	0.993	0.0069	0	0	NA	1	0.993	Subpop.1
PI506073	-0.0551	0.0298	1	0	0	0	NA	1	1	Subpop.1
PI453288	0.0472	0.0287	0	0.2709	0	0.7291	NA	4	0.7291	Admixed
PI452616	0.0366	0.0074	0	0.4882	0	0.5118	NA	4	0.5118	Admixed
PI521088	-0.0146	-0.0047	0	0	1	0	NA	3	1	Subpop.3
PI585540	0.0539	0.0598	0	0	0	1	NA	4	1	Subpop.4
PI520872	-0.0154	-0.0042	0	0	1	0	NA	3	1	Subpop.3
NSL54612	0.0139	-0.0416	0	1	0	0	NA	2	1	Subpop.2
PI456899B	0.0178	-0.039	0	1	0	0	NA	2	1	Subpop.2
PI453914	0.0336	0.0382	0	0	0	1	NA	4	1	Subpop.4
PI452580	0.0364	-0.0106	0	0.6612	0	0.3388	NA	2	0.6612	Admixed
PI453118	0.0283	-0.0013	0	0.5798	0	0.4202	NA	2	0.5798	Admixed
PI570071	-0.0178	0.0006	0.0541	0	0.9459	0	NA	3	0.9459	Subpop.3
PI329843	0.0547	0.0578	0	0.0222	0	0.9778	NA	4	0.9778	Subpop.4
PI453129	0.0367	0.0114	0	0.4289	0	0.5711	NA	4	0.5711	Admixed
PI526080	0.0136	-0.0342	0	0.9566	0.0434	0	NA	2	0.9566	Subpop.2
PI524475	-0.013	-0.0046	0	0	1	0	Caudatum-bicolor	3	1	Subpop.3
PI329585	0.0557	0.0622	0	0	0	1	NA	4	1	Subpop.4
PI651103	-0.0517	0.0261	1	0	0	0	NA	1	1	Subpop.1
PI329614	0.0574	0.0617	0	0	0	1	NA	4	1	Subpop.4
PI562980	-0.0486	0.0256	1	0	0	0	NA	1	1	Subpop.1
PI329541	0.051	0.0569	0	0	0	1	NA	4	1	Subpop.4
PI525750	-0.0427	0.0169	0.9953	0	0	0.0047	NA	1	0.9953	Subpop.1
PI453006	0.017	-0.0292	0	0.8614	0.0446	0.094	NA	2	0.8614	Subpop.2
PI569458	-0.0119	-0.0049	0.1057	0.1171	0.7773	0	NA	3	0.7773	Admixed
PI456722	0.0207	-0.045	0	1	0	0	NA	2	1	Subpop.2
PI527676	-0.0183	0.0053	0.0706	0	0.9294	0	NA	3	0.9294	Subpop.3
PI526053	-0.0432	0.017	1	0	0	0	NA	1	1	Subpop.1
PI453848	0.0427	0.0091	0	0.4858	0	0.5142	NA	4	0.5142	Admixed
PI329613	0.0587	0.0609	0	0	0	1	NA	4	1	Subpop.4
PI329717	0.0559	0.0581	0	0	0	1	NA	4	1	Subpop.4
PI563352	-0.0519	0.0279	1	0	0	0	NA	1	1	Subpop.1
PI329471	0.0538	0.0605	0	0	0	1	NA	4	1	Subpop.4
PI329645	0.051	0.0556	0	0	0	1	NA	4	1	Subpop.4
PI525882	-0.0463	0.0193	1	0	0	0	NA	1	1	Subpop.1
PI569452	-0.0144	-0.0053	0	0	1	0	NA	3	1	Subpop.3
PI330833	0.0182	0.0273	0	0	0.4716	0.5284	NA	4	0.5284	Admixed
PI570388	-0.0135	-0.0013	0	0	1	0	NA	3	1	Subpop.3
PI266927	0.0112	-0.037	0	0.89	0.11	0	NA	2	0.89	Subpop.2
PI329319	0.0563	0.0584	0	0	0	1	NA	4	1	Subpop.4
NSL50752	-0.0477	0.0246	1	0	0	0	NA	1	1	Subpop.1
PI276853B	0.0383	0.0404	0.0019	0	0.2557	0.7424	NA	4	0.7424	Admixed
PI329480	0.0519	0.0536	0	0	0	1	NA	4	1	Subpop.4
PI452968	0.0221	-0.0507	0	1	0	0	NA	2	1	Subpop.2
PI526108	-0.0463	0.0202	1	0	0	0	NA	1	1	Subpop.1
PI525842	-0.0427	0.0176	1	0	0	0	NA	1	1	Subpop.1
PI330019	0.0509	0.054	0	0	0	1	NA	4	1	Subpop.4
PI513912	-0.0481	0.0254	1	0	0	0	NA	1	1	Subpop.1
PI329552	0.0429	0.0276	0	0.2626	0	0.7374	NA	4	0.7374	Admixed
PI330184	0.0265	-0.0178	0	0.7564	0	0.2436	NA	2	0.7564	Admixed
PI651116	-0.0431	0.0211	1	0	0	0	Guinea	1	1	Subpop.1
PI329525	0.052	0.0541	0	0	0	1	NA	4	1	Subpop.4
PI453395	0.0227	-0.0485	0	1	0	0	NA	2	1	Subpop.2
PI330807	-0.0094	-0.0045	0	0.0518	0.9482	0	NA	3	0.9482	Subpop.3
PI452729	0	0	0.0141	0.0142	0.0142	0.9575	NA	4	0.9575	Subpop.4
NSL50587	-0.044	0.0232	1	0	0	0	NA	1	1	Subpop.1
PI329665	0.0574	0.0606	0	0	0	1	NA	4	1	Subpop.4
PI646242	-0.0038	0.0004	0	0	0.9999	0	NA	3	0.9999	Subpop.3
PI524814	-0.0223	0.0019	0	0	1	0	NA	3	1	Subpop.3
PI453370	0.0337	0.0119	0	0.4084	0	0.5916	NA	4	0.5916	Admixed
PI452946	0	0	0.003	0.7766	0.003	0.2174	NA	2	0.7766	Admixed
PI525641	-0.0388	0.0155	1	0	0	0	NA	1	1	Subpop.1
PI329958	0.0548	0.0577	0	0	0	1	NA	4	1	Subpop.4
PI329299	0.0184	-0.041	0	1	0	0	NA	2	1	Subpop.2
PI455251	-0.0055	-0.0143	0.4121	0.5511	0	0.0368	NA	2	0.5511	Admixed
NSL54219	-0.031	0.0087	0.9621	0	0	0.0379	NA	1	0.9621	Subpop.1
PI453392	0.0204	-0.044	0	1	0	0	NA	2	1	Subpop.2
PI456421	0.0184	-0.0403	0	1	0	0	NA	2	1	Subpop.2
PI525896	-0.0463	0.0201	1	0	0	0	NA	1	1	Subpop.1
PI329890	0.0524	0.0532	0	0	0	1	NA	4	1	Subpop.4
PI525949	-0.0462	0.0189	1	0	0	0	NA	1	1	Subpop.1
PI329429	0.0081	-0.0182	0.1225	0.784	0	0.0935	NA	2	0.784	Admixed
PI457167	0.0159	-0.0344	0.0006	0.9429	0.0565	0	NA	2	0.9429	Subpop.2
PI481848	-0.0217	0.0009	0	0	1	0	NA	3	1	Subpop.3
PI329617	0.0356	0.0381	0	0.1611	0	0.8389	NA	4	0.8389	Subpop.4
PI267592	-0.0057	0.0346	0.6114	0	0	0.3886	NA	1	0.6114	Admixed
NSL55279	0.0174	-0.0442	0	0.9557	0.0443	0	NA	2	0.9557	Subpop.2
PI562968	-0.0211	0.0034	0.4892	0	0.5108	0	NA	3	0.5108	Admixed
PI329362	-0.013	0.0025	0.0653	0	0.8963	0.0384	NA	3	0.8963	Subpop.3
PI452611	0.0223	-0.0486	0	1	0	0	NA	2	1	Subpop.2
PI452890	0.0581	0.0519	0	0.1078	0	0.8922	NA	4	0.8922	Subpop.4
PI291081	0.0509	0.0589	0	0	0	1	NA	4	1	Subpop.4
PI525667	-0.0435	0.0177	1	0	0	0	NA	1	1	Subpop.1
PI329698	0.0596	0.0659	0	0	0	1	NA	4	1	Subpop.4
PI453257	0.0194	-0.0392	0	1	0	0	NA	2	1	Subpop.2
PI457178	0.0132	-0.0304	0	0.981	0.019	0	NA	2	0.981	Subpop.2
PI525876	-0.0471	0.0202	1	0	0	0	NA	1	1	Subpop.1
PI330049	0.0586	0.0613	0	0	0	1	NA	4	1	Subpop.4
PI563329	0.0204	-0.0431	0	1	0	0	NA	2	1	Subpop.2
PI329570	0.0516	0.0578	0	0	0	1	NA	4	1	Subpop.4
PI329662	0.0493	0.0509	0	0	0	1	NA	4	1	Subpop.4
PI521181	-0.0164	-0.0029	0	0	1	0	NA	3	1	Subpop.3
PI514254	-0.0523	0.0286	1	0	0	0	NA	1	1	Subpop.1
PI454848	0.0091	0.043	0.4786	0.0297	0	0.4916	NA	4	0.4916	Admixed
PI660600	-0.0329	0.0118	0.9486	0.0514	0	0	NA	1	0.9486	Subpop.1
PI453215	0.0196	-0.0277	0	0.8877	0	0.1123	NA	2	0.8877	Subpop.2
PI526101	0.011	-0.0279	0.043	0.7831	0.1423	0.0316	NA	2	0.7831	Admixed
PI585951	-0.0549	0.0297	1	0	0	0	NA	1	1	Subpop.1
PI453237	0.0348	0.0358	0	0.0249	0.245	0.7301	NA	4	0.7301	Admixed
PI329813	0.0167	-0.0367	0	1	0	0	NA	2	1	Subpop.2
PI514425	-0.0417	0.0167	0.992	0.008	0	0	NA	1	0.992	Subpop.1
PI453121	0.0353	0.0018	0	0.5427	0	0.4573	NA	2	0.5427	Admixed
PI452980	0.0214	-0.0488	0	1	0	0	NA	2	1	Subpop.2
PI563330	0.02	-0.0431	0	1	0	0	NA	2	1	Subpop.2
PI525676	0.013	-0.0313	0	0.8321	0.1679	0	NA	2	0.8321	Subpop.2
PI585956	-0.0507	0.0275	1	0	0	0	NA	1	1	Subpop.1
PI514291	-0.0381	0.0148	0.8962	0.0174	0.0864	0	NA	1	0.8962	Subpop.1
PI505739	-0.0168	0.0002	0	0	1	0	NA	3	1	Subpop.3
PI570106	0	0	0.9876	0.0041	0.0041	0.0041	Guinea-caudatum	1	0.9876	Subpop.1
PI571001	-0.015	-0.01	0	0.0105	0.9895	0	Caudatum	3	0.9895	Subpop.3
PI276856	0.0475	0.0539	0	0	0	1	NA	4	1	Subpop.4
PI329310	0.0229	-0.0433	0	1	0	0	NA	2	1	Subpop.2
PI329300	0	0	0.25	0.25	0.25	0.25	NA	Admixed	0.25	Admixed
NSL54490	-0.0111	-0.005	0	0.0028	0.9972	0	NA	3	0.9972	Subpop.3
NSL51356	-0.0216	0.0028	0.1939	0	0.8061	0	Kafir	3	0.8061	Subpop.3
PI282861	-0.0082	0.007	0.299	0.1782	0.3702	0.1526	NA	3	0.3702	Admixed
PI570254	-0.0055	-0.0132	0.0198	0.2584	0.7209	0.0009	NA	3	0.7209	Admixed
NSL55230	0.0135	-0.0397	0	1	0	0	NA	2	1	Subpop.2
NSL50646	-0.045	0.0225	1	0	0	0	NA	1	1	Subpop.1
PI156489	-0.0216	0.0065	0.1428	0	0.8572	0	NA	3	0.8572	Subpop.3
PI526043	-0.0421	0.017	1	0	0	0	NA	1	1	Subpop.1
PI521159	-0.0122	-0.0049	0	0	1	0	NA	3	1	Subpop.3
PI570109	-0.0112	-0.0009	0	0	1	0	NA	3	1	Subpop.3
PI329321	-0.0081	-0.0025	0	0	1	0	NA	3	1	Subpop.3
PI525630	-0.042	0.0173	0.9741	0.0259	0	0	NA	1	0.9741	Subpop.1
PI330843	0.0463	0.0525	0	0	0	1	NA	4	1	Subpop.4
PI568676	-0.0138	-0.0066	0.0576	0.0473	0.8951	0	NA	3	0.8951	Subpop.3
PI156248	-0.0169	-0.0044	0.1804	0.1162	0.7034	0	NA	3	0.7034	Admixed
PI506030A	-0.0409	0.0171	1	0	0	0	NA	1	1	Subpop.1
PI329524	0.0631	0.0652	0	0	0	1	NA	4	1	Subpop.4
PI569264	0.0115	-0.0355	0.0483	0.8168	0.135	0	NA	2	0.8168	Subpop.2
PI329528	0.0582	0.0624	0	0	0	1	NA	4	1	Subpop.4
PI455257	0.0222	-0.0415	0	0.9594	0	0.0406	NA	2	0.9594	Subpop.2
PI525669	-0.0046	-0.0174	0.3781	0.59	0.0319	0	NA	2	0.59	Admixed
PI453123	0.0346	0.0187	0	0.3487	0	0.6513	NA	4	0.6513	Admixed
PI526002	-0.0461	0.0195	1	0	0	0	NA	1	1	Subpop.1
PI456401A	0.022	-0.0445	0	1	0	0	NA	2	1	Subpop.2
NSL365766	-0.0365	0.0145	1	0	0	0	NA	1	1	Subpop.1
PI329367	0.0253	-0.018	0	0.7632	0	0.2368	NA	2	0.7632	Admixed
PI570031	-0.0159	0	0.0483	0	0.951	0.0007	NA	3	0.951	Subpop.3
PI563338	-0.0503	0.0219	1	0	0	0	NA	1	1	Subpop.1
PI453766	0.0387	0.0224	0	0.2898	0.0975	0.6127	NA	4	0.6127	Admixed
PI562944	-0.0104	-0.0068	0	0	0.9995	0.0005	NA	3	0.9995	Subpop.3
PI453110	0.0448	0.0451	0	0.0152	0	0.9847	NA	4	0.9847	Subpop.4
PI562963	-0.0092	-0.0045	0.1598	0	0.8402	0	Caudatum	3	0.8402	Subpop.3
PI453016	0.0138	-0.023	0	0.8826	0	0.1174	NA	2	0.8826	Subpop.2
PI329478	0.0497	0.0523	0	0	0	1	NA	4	1	Subpop.4
PI525884	-0.0447	0.0191	1	0	0	0	NA	1	1	Subpop.1
PI525875	-0.0445	0.019	1	0	0	0	NA	1	1	Subpop.1
PI282862	-0.0139	0.0067	0.3233	0.1377	0.4444	0.0946	NA	3	0.4444	Admixed
PI330204	0.0259	0.0115	0.0153	0.3953	0	0.5895	NA	4	0.5895	Admixed
PI514345	-0.0464	0.0202	1	0	0	0	NA	1	1	Subpop.1
PI454078	0.0341	0.0072	0	0.4791	0	0.5209	NA	4	0.5209	Admixed
PI457183B	0	0	0.6506	0.3299	0.01	0.0095	NA	1	0.6506	Admixed
PI329465	0.0277	0.0212	0	0.2188	0	0.7812	NA	4	0.7812	Admixed
PI570110	-0.0144	-0.0034	0.1374	0.0785	0.784	0	Guinea-caudatum	3	0.784	Admixed
PI455403	0.0179	-0.0394	0	1	0	0	NA	2	1	Subpop.2
PI329513	0.0569	0.0599	0	0	0	1	NA	4	1	Subpop.4
PI152593	0.0072	-0.0175	0.0589	0.6181	0.2462	0.0768	NA	2	0.6181	Admixed
PI526078	-0.036	0.0126	0.923	0.077	0	0	NA	1	0.923	Subpop.1
PI526034	-0.0459	0.0196	1	0	0	0	NA	1	1	Subpop.1
PI453036	0	-0.0001	0.0034	0.9899	0.0034	0.0034	NA	2	0.9899	Subpop.2
PI456423	0.0366	0.0037	0	0.5163	0	0.4837	NA	2	0.5163	Admixed
PI513896	-0.0454	0.0193	1	0	0	0	NA	1	1	Subpop.1
PI453030	0	0	0.0116	0.965	0.0116	0.0117	NA	2	0.965	Subpop.2
PI453690	0.021	-0.0461	0	1	0	0	NA	2	1	Subpop.2
PI563350	-0.0467	0.0202	1	0	0	0	NA	1	1	Subpop.1
PI526124	-0.0203	-0.0018	0.4054	0.1684	0.4262	0	NA	3	0.4262	Admixed
PI570400	-0.0184	0.001	0.0847	0	0.9152	0	Guinea-caudatum	3	0.9152	Subpop.3
PI569460	-0.0159	-0.0039	0	0	1	0	NA	3	1	Subpop.3
PI276828	-0.0136	-0.0108	0	0.0559	0.9441	0	NA	3	0.9441	Subpop.3
PI329493	0.0385	0.0421	0	0	0.0925	0.9075	NA	4	0.9075	Subpop.4
NSL54175	-0.0326	0.0113	1	0	0	0	Guinea	1	1	Subpop.1
PI521043	-0.0133	-0.0043	0	0	1	0	NA	3	1	Subpop.3
PI526015	-0.0559	0.0304	1	0	0	0	NA	1	1	Subpop.1
NSL54894	-0.0111	-0.0138	0	0.1194	0.8806	0	NA	3	0.8806	Subpop.3
PI526017	-0.0368	0.0146	1	0	0	0	NA	1	1	Subpop.1
PI329333	-0.0043	-0.0084	0	0.1371	0.8629	0	NA	3	0.8629	Subpop.3
PI330185	0.0234	-0.0475	0	1	0	0	NA	2	1	Subpop.2
PI563353	-0.0556	0.0298	1	0	0	0	NA	1	1	Subpop.1
PI452714	0.0214	-0.0305	0	0.8854	0.0029	0.1116	NA	2	0.8854	Subpop.2
PI505720	-0.0186	0.0006	0	0	1	0	NA	3	1	Subpop.3
PI291084	-0.0004	0.0178	0.0442	0	0.6735	0.2823	NA	3	0.6735	Admixed
PI457597	0.0281	-0.0006	0	0.5224	0.0737	0.4039	NA	2	0.5224	Admixed
PI329482	0.0556	0.0636	0	0	0	1	NA	4	1	Subpop.4
PI526152	-0.0446	0.02	1	0	0	0	NA	1	1	Subpop.1
PI454674	0.022	-0.0456	0	1	0	0	NA	2	1	Subpop.2
PI454927	0.0183	0.0312	0.3261	0.2223	0	0.4516	NA	4	0.4516	Admixed
PI156326	-0.0195	0.0035	0.052	0	0.948	0	Caudatum	3	0.948	Subpop.3
PI452906	0.0323	0.024	0	0.2094	0.1289	0.6617	NA	4	0.6617	Admixed
PI525871	-0.0366	0.0145	1	0	0	0	NA	1	1	Subpop.1
PI660556	-0.0397	0.0187	1	0	0	0	Guinea	1	1	Subpop.1
PI330887	0.0192	-0.0382	0	1	0	0	Durra	2	1	Subpop.2
PI329615	0.0566	0.0594	0	0	0	1	NA	4	1	Subpop.4
NSL54141	-0.0314	0.0099	0.9132	0.0868	0	0	Guinea	1	0.9132	Subpop.1
PI329403	0.0191	-0.0399	0	0.9987	0	0.0013	NA	2	0.9987	Subpop.2
NSL55693	0.0166	-0.0485	0	1	0	0	NA	2	1	Subpop.2
PI505717	-0.031	0.0083	0.3876	0	0.6124	0	NA	3	0.6124	Admixed
PI452991	0.0205	-0.0441	0	1	0	0	NA	2	1	Subpop.2
PI562991	-0.0355	0.019	1	0	0	0	Guinea	1	1	Subpop.1
PI569457	-0.0096	-0.0062	0.0139	0	0.9861	0	NA	3	0.9861	Subpop.3
NSL55458A	-0.0442	0.021	0.9607	0	0.0393	0	NA	1	0.9607	Subpop.1
NSL52313	-0.0082	-0.0157	0	0.1982	0.8018	0	NA	3	0.8018	Subpop.3
PI570053	-0.0157	-0.0036	0.0726	0	0.9274	0	NA	3	0.9274	Subpop.3
PI563009	-0.0459	0.0221	1	0	0	0	Guinea-caudatum	1	1	Subpop.1
PI521025	-0.0149	-0.0036	0	0	1	0	NA	3	1	Subpop.3
PI329679	0.0608	0.0628	0	0	0	1	NA	4	1	Subpop.4
PI454019	0.0296	0.0312	0	0.1255	0	0.8745	NA	4	0.8745	Subpop.4
NSL51963	-0.0116	-0.0131	0.4223	0.4043	0.1733	0	Caudatum	1	0.4223	Admixed
PI329511	0.0235	-0.0337	0	0.9167	0	0.0833	NA	2	0.9167	Subpop.2
PI506013	-0.0429	0.018	1	0	0	0	NA	1	1	Subpop.1
PI276784	0.0313	-0.0046	0	0.6202	0	0.3798	NA	2	0.6202	Admixed
PI452942	0.0584	0.0661	0	0	0	1	NA	4	1	Subpop.4
PI329506	0.0521	0.0553	0	0	0	1	NA	4	1	Subpop.4
PI329278	0.0618	0.0644	0	0	0	1	NA	4	1	Subpop.4
PI521018	-0.0161	-0.0047	0	0	1	0	NA	3	1	Subpop.3
PI452931	0.0588	0.0554	0	0.065	0	0.935	NA	4	0.935	Subpop.4
PI481843	-0.0221	0.0007	0	0	1	0	NA	3	1	Subpop.3
PI453014	0.0154	-0.027	0	0.884	0	0.116	NA	2	0.884	Subpop.2
PI525801	-0.0029	-0.0176	0.3566	0.6061	0.0259	0.0114	NA	2	0.6061	Admixed
PI329501	0.0583	0.0615	0	0	0	1	NA	4	1	Subpop.4
PI457822	0.0325	0.0042	0	0.5255	0	0.4745	NA	2	0.5255	Admixed
PI453522	0.0211	-0.0453	0	1	0	0	NA	2	1	Subpop.2
PI156510	-0.0215	0.0057	0.1336	0	0.8664	0	NA	3	0.8664	Subpop.3
PI330267	-0.0068	-0.0086	0	0.1465	0.8535	0	NA	3	0.8535	Subpop.3
PI452927	0.0371	0.0311	0	0.131	0.1575	0.7114	NA	4	0.7114	Admixed
PI330030A	0.0561	0.0581	0	0	0	1	NA	4	1	Subpop.4
PI454687	0.0228	0.0036	0	0.392	0.1967	0.4113	NA	4	0.4113	Admixed
PI570712	-0.0114	-0.0068	0	0.0378	0.9622	0	Caudatum	3	0.9622	Subpop.3
PI318910	0.0048	-0.0216	0.038	0.6312	0.3308	0	NA	2	0.6312	Admixed
PI524689	-0.0087	-0.0071	0.0068	0.0937	0.8995	0	NA	3	0.8995	Subpop.3
PI570075	-0.0174	-0.0005	0.0665	0	0.9335	0	NA	3	0.9335	Subpop.3
PI330169	0.0219	-0.0451	0	1	0	0	NA	2	1	Subpop.2
PI525815	-0.0441	0.0178	1	0	0	0	NA	1	1	Subpop.1
PI453127	0	0	0.0202	0.9386	0.0204	0.0208	NA	2	0.9386	Subpop.2
PI500996	-0.0191	0.0008	0	0	1	0	NA	3	1	Subpop.3
PI453109	0	0	0.25	0.25	0.25	0.25	NA	Admixed	0.25	Admixed
PI453453	0.0203	-0.0443	0	1	0	0	NA	2	1	Subpop.2
PI337680	0.0416	0.014	0	0.4289	0	0.5711	NA	4	0.5711	Admixed
PI526045	-0.0435	0.0182	1	0	0	0	NA	1	1	Subpop.1
PI329720	0.0512	0.0433	0	0.1471	0	0.8529	NA	4	0.8529	Subpop.4
PI452807	0	-0.0001	0.0056	0.9831	0.0057	0.0056	NA	2	0.9831	Subpop.2
PI525827	-0.0431	0.0177	1	0	0	0	NA	1	1	Subpop.1
PI329787	-0.002	-0.0127	0	0.2745	0.683	0.0424	NA	3	0.683	Admixed
PI525769	-0.0286	0.0031	0.7297	0.2498	0.0198	0.0008	NA	1	0.7297	Admixed
PI585433	-0.0201	0.0002	0	0	1	0	NA	3	1	Subpop.3
PI514427	-0.0405	0.0224	0.8497	0	0.0956	0.0546	NA	1	0.8497	Subpop.1
PI329383	0.043	0.02	0	0.3623	0	0.6377	NA	4	0.6377	Admixed
PI329605	0.052	0.0567	0	0	0	1	NA	4	1	Subpop.4
PI585549	0.0572	0.0628	0	0	0	1	NA	4	1	Subpop.4
PI514390	-0.0429	0.0183	1	0	0	0	NA	1	1	Subpop.1
PI330030B	-0.0504	0.0265	1	0	0	0	NA	1	1	Subpop.1
PI452988	0.0219	-0.0481	0	1	0	0	NA	2	1	Subpop.2
PI586022	-0.0554	0.0293	1	0	0	0	NA	1	1	Subpop.1
PI569420	-0.0131	-0.0039	0	0.0407	0.956	0.0033	NA	3	0.956	Subpop.3
PI329841	0.0356	-0.0055	0	0.6096	0.0039	0.3865	NA	2	0.6096	Admixed
PI524469	0.0026	-0.0149	0.048	0.4375	0.4574	0.0571	NA	3	0.4574	Admixed
PI147828	0.0207	-0.0442	0	1	0	0	Durra	2	1	Subpop.2
PI329656	0.0508	0.055	0	0	0	1	NA	4	1	Subpop.4
PI330023	0.0655	0.0664	0	0	0	1	NA	4	1	Subpop.4
PI570074	-0.0185	0.0005	0	0	1	0	Guinea-caudatum	3	1	Subpop.3
PI569462	-0.0034	-0.0019	0.0143	0	0.9856	0	NA	3	0.9856	Subpop.3
PI521020	-0.0159	-0.0031	0	0	1	0	NA	3	1	Subpop.3
PI521153	-0.0149	-0.0029	0	0	1	0	NA	3	1	Subpop.3
NSL55460	0.0096	-0.0374	0.1321	0.8405	0.0274	0	NA	2	0.8405	Subpop.2
PI329256	0	0	0.0241	0.9269	0.0246	0.0244	NA	2	0.9269	Subpop.2
NSL55723	0.0158	-0.0477	0	1	0	0	NA	2	1	Subpop.2
PI453281	0.0186	-0.0384	0	1	0	0	NA	2	1	Subpop.2
PI452584	0.0242	-0.0504	0	1	0	0	NA	2	1	Subpop.2
PI514196	-0.0407	0.018	0.8914	0.1086	0	0	NA	1	0.8914	Subpop.1
PI147938	0.0795	0.087	0	0	0	1	Durra	4	1	Subpop.4
PI266061	-0.0178	0.0009	0.1014	0	0.893	0.0056	NA	3	0.893	Subpop.3
PI453365	0.0208	-0.0407	0	1	0	0	NA	2	1	Subpop.2
PI521168	-0.0165	-0.0015	0	0	1	0	NA	3	1	Subpop.3
PI329998	0.0481	0.0508	0	0	0	1	NA	4	1	Subpop.4
PI452987	0.0213	-0.0477	0	1	0	0	NA	2	1	Subpop.2
PI452578	0.0231	-0.0491	0	1	0	0	NA	2	1	Subpop.2
PI452928	0.0605	0.0668	0	0	0	1	NA	4	1	Subpop.4
PI452984	0.0177	-0.0294	0	0.8892	0	0.1108	NA	2	0.8892	Subpop.2
PI452967	0.0571	0.0597	0	0	0	1	NA	4	1	Subpop.4
NSL50745	-0.0401	0.0198	1	0	0	0	NA	1	1	Subpop.1
PI276844	0.0002	0	0.0016	0.6072	0.0016	0.3897	NA	2	0.6072	Admixed
PI329624	0.0539	0.0587	0	0.0077	0	0.9923	NA	4	0.9923	Subpop.4
PI514475	-0.0457	0.0197	1	0	0	0	NA	1	1	Subpop.1
PI453157	0.0191	-0.0427	0	1	0	0	NA	2	1	Subpop.2
PI562897	-0.0455	0.021	1	0	0	0	Guinea	1	1	Subpop.1
PI457145	0.0202	-0.0414	0	1	0	0	NA	2	1	Subpop.2
PI452995	0.0267	-0.0389	0	0.9209	0	0.0791	NA	2	0.9209	Subpop.2
PI453329	0.0247	-0.0366	0	0.9282	0	0.0718	NA	2	0.9282	Subpop.2
PI330800	0.0402	0.0446	0	0	0	1	NA	4	1	Subpop.4
PI526147	-0.0452	0.0192	1	0	0	0	NA	1	1	Subpop.1
PI562715	-0.029	0.011	0.8234	0.0446	0.1321	0	NA	1	0.8234	Subpop.1
PI526032	-0.0394	0.0159	1	0	0	0	NA	1	1	Subpop.1
PI563351	-0.006	-0.0115	0	0.1453	0.8547	0	NA	3	0.8547	Subpop.3
PI452947	0.048	0.0405	0	0.1653	0	0.8347	NA	4	0.8347	Subpop.4
PI453315	0.0184	-0.035	0	1	0	0	NA	2	1	Subpop.2
PI452874	0.0243	-0.0515	0	1	0	0	NA	2	1	Subpop.2
PI521019	-0.0179	-0.0028	0	0	1	0	Durra-caudatum	3	1	Subpop.3
PI552851	0.0123	-0.0257	0	0.8872	0	0.1128	NA	2	0.8872	Subpop.2
PI525941	-0.0233	0.024	0.5466	0	0.2645	0.1889	NA	1	0.5466	Admixed
PI329965	0.0597	0.0618	0	0	0	1	NA	4	1	Subpop.4
PI570393	-0.0095	-0.0068	0.0086	0.0647	0.9267	0	Caudatum	3	0.9267	Subpop.3
PI453312	0.0352	-0.0005	0	0.5688	0	0.4311	NA	2	0.5688	Admixed
PI276776	0	0	0.3521	0.0051	0.4336	0.2092	NA	3	0.4336	Admixed
PI496311	-0.0184	0.0033	0.0521	0	0.9478	0	NA	3	0.9478	Subpop.3
PI452753	0.0326	-0.0159	0	0.7258	0	0.2742	NA	2	0.7258	Admixed
PI453464	0.0225	-0.0484	0	1	0	0	NA	2	1	Subpop.2
PI453179	0.0359	-0.0046	0	0.5935	0	0.4065	NA	2	0.5935	Admixed
PI452632	0.0159	-0.0357	0	1	0	0	NA	2	1	Subpop.2
PI453882	0.0397	0.0057	0	0.5121	0	0.4879	NA	2	0.5121	Admixed
PI505719	0.0006	0.0159	0.0237	0	0.722	0.2543	NA	3	0.722	Admixed
PI585961	-0.0571	0.0323	1	0	0	0	Guinea	1	1	Subpop.1
PI453326	0.039	0.0132	0	0.4286	0	0.5714	NA	4	0.5714	Admixed
PI297128	-0.0131	-0.0046	0	0	1	0	NA	3	1	Subpop.3
PI453852	0.0385	0.0003	0	0.5679	0	0.4321	NA	2	0.5679	Admixed
PI514253	-0.0419	0.0221	1	0	0	0	NA	1	1	Subpop.1
PI330125	0.035	0.0022	0	0.549	0	0.451	NA	2	0.549	Admixed
PI452804	0.0214	-0.0466	0	1	0	0	NA	2	1	Subpop.2
PI452891	0.036	0.0059	0	0.5095	0	0.4905	NA	2	0.5095	Admixed
PI452519	0	0	0.0069	0.9792	0.0069	0.0069	NA	2	0.9792	Subpop.2
PI452770	0.0223	-0.0405	0	1	0	0	NA	2	1	Subpop.2
PI525814	-0.0432	0.0178	1	0	0	0	NA	1	1	Subpop.1
PI329521	0.065	0.0709	0	0	0	1	NA	4	1	Subpop.4
PI520857	-0.0169	-0.0017	0	0	1	0	NA	3	1	Subpop.3
PI267551	0.0526	0.0587	0	0	0	1	NA	4	1	Subpop.4
PI452994	0.0212	-0.0452	0	1	0	0	NA	2	1	Subpop.2
PI453953	0.0498	0.0526	0	0	0	1	NA	4	1	Subpop.4
PI329514	0	0	0.7261	0.0914	0.0912	0.0914	NA	1	0.7261	Admixed
PI452736	0.0158	-0.0193	0.0122	0.6314	0.2184	0.1381	NA	2	0.6314	Admixed
PI267633	0.0307	-0.0039	0.0009	0.6115	0	0.3877	NA	2	0.6115	Admixed
PI453236	0.0143	0.0078	0	0.2027	0.4684	0.3289	NA	3	0.4684	Admixed
PI525780	-0.0425	0.0178	1	0	0	0	NA	1	1	Subpop.1
PI525919	-0.0395	0.0166	1	0	0	0	NA	1	1	Subpop.1
SORGRASS	-0.0155	0.0053	0.0578	0	0.9278	0.0143	NA	3	0.9278	Subpop.3
PI453216	0.011	-0.0244	0	1	0	0	NA	2	1	Subpop.2
PI329845	0.0352	0.0155	0	0.363	0	0.637	NA	4	0.637	Admixed
PI221624	-0.0456	0.024	1	0	0	0	Guinea	1	1	Subpop.1
PI456392	0.0277	-0.0258	0	0.828	0	0.172	NA	2	0.828	Subpop.2
PI562998	-0.0369	0.0194	1	0	0	0	Guinea	1	1	Subpop.1
PI329549	0.0452	0.0518	0	0	0	1	NA	4	1	Subpop.4
PI525677	-0.0421	0.0177	1	0	0	0	NA	1	1	Subpop.1
PI524456	-0.0101	-0.0053	0.0069	0	0.9931	0	NA	3	0.9931	Subpop.3
PI660598	-0.054	0.0207	0.928	0	0.072	0	NA	1	0.928	Subpop.1
PI660588	-0.0158	-0.0083	0	0.0249	0.9751	0	NA	3	0.9751	Subpop.3
PI330095	0.0275	-0.0584	0	0.9643	0.0142	0.0215	Durra	2	0.9643	Subpop.2
NSL52327	-0.0175	-0.0143	0	0.0543	0.9457	0	NA	3	0.9457	Subpop.3
PI147933	0.0584	0.0588	0	0.0585	0.1368	0.8048	Durra	4	0.8048	Subpop.4
PI563509	0.0792	0.088	0	0	0	1	Durra	4	1	Subpop.4
NSL55734	0.0261	-0.0786	0	1	0	0	NA	2	1	Subpop.2
NSL102183	-0.0286	0.0004	0.1898	0	0.8096	0.0006	Caudatum	3	0.8096	Subpop.3
NSL55694	0.0242	-0.0761	0	1	0	0	NA	2	1	Subpop.2
NSL50601	-0.0679	0.0339	1	0	0	0	NA	1	1	Subpop.1
PI147922	0.0638	0.0668	0	0.0107	0.0732	0.9161	NA	4	0.9161	Subpop.4
NSL54297	-0.0236	-0.0049	0	0	1	0	Caudatum	3	1	Subpop.3
PI276790	0.0369	-0.0307	0	0.7774	0.0116	0.211	Durra	2	0.7774	Admixed
NSL51691	-0.026	-0.0017	0.1862	0.0015	0.8123	0	NA	3	0.8123	Subpop.3
PI152611	-0.0157	-0.0109	0.0027	0.0257	0.9716	0	NA	3	0.9716	Subpop.3
PI660597	-0.0328	0.0082	0.8328	0.0554	0.1118	0	Caudatum	1	0.8328	Subpop.1
PI329707	0.0288	-0.0595	0	1	0	0	Durra	2	1	Subpop.2
PI267653	-0.0018	0.0082	0.0212	0.0503	0.7583	0.1702	Durra	3	0.7583	Admixed
NSL54147	-0.0451	0.012	0.8102	0.0486	0.1412	0	NA	1	0.8102	Subpop.1
NSL55043	-0.0165	-0.0248	0	0.1031	0.8969	0	NA	3	0.8969	Subpop.3
PI282868	-0.0365	0.0219	0.3917	0	0.6083	0	NA	3	0.6083	Admixed
PI153859	-0.0204	-0.0097	0	0.0266	0.9734	0	NA	3	0.9734	Subpop.3
NSL50350	-0.0158	-0.0165	0	0.0566	0.9434	0	NA	3	0.9434	Subpop.3
PI660595	-0.0311	0.0092	0.8275	0.0701	0.1024	0	Guinea	1	0.8275	Subpop.1
NSL55678	0.0196	-0.066	0.0164	0.9836	0	0	NA	2	0.9836	Subpop.2
PI297117	-0.0198	-0.0094	0	0	1	0	Caudatum	3	1	Subpop.3
PI647743	-0.0497	0.0159	0.985	0	0	0.0149	Durra	1	0.985	Subpop.1
PI148083	0.0213	-0.0559	0	0.9113	0.0887	0	Durra	2	0.9113	Subpop.2
NSL51030	-0.0613	0.0242	0.92	0.0043	0.0757	0	NA	1	0.92	Subpop.1
PI152748	-0.0484	0.0169	0.5293	0	0.4707	0	Caudatum	1	0.5293	Admixed
PI148108	0.0052	-0.0371	0	0.4979	0.5021	0	NA	3	0.5021	Admixed
PI152594	0.0136	-0.0321	0	0.5489	0.3776	0.0735	Durra	2	0.5489	Admixed
PI330877	0.0871	0.0896	0	0	0	1	Durra	4	1	Subpop.4
PI185458	-0.0513	0.0233	0.9228	0	0.0569	0.0203	NA	1	0.9228	Subpop.1
PI267650	0.0374	-0.0363	0	0.8235	0	0.1765	Durra	2	0.8235	Subpop.2
PI651141	-0.0624	0.0308	0.8811	0	0.1189	0	Guinea	1	0.8811	Subpop.1
NSL55643	0.0028	-0.0342	0	0.4804	0.5196	0	NA	3	0.5196	Admixed
PI660605	-0.0075	-0.0052	0.1758	0	0.8043	0.0199	NA	3	0.8043	Subpop.3
NSL365751	-0.0106	-0.0145	0	0.1066	0.8934	0	NA	3	0.8934	Subpop.3
PI660571	-0.0166	-0.0122	0	0.0162	0.9838	0	Caudatum	3	0.9838	Subpop.3
PI660599	-0.05	0.0127	0.8032	0.0409	0.156	0	NA	1	0.8032	Subpop.1
NSL55665	0.0219	-0.0727	0	1	0	0	NA	2	1	Subpop.2
NSL50451	-0.0244	-0.0005	0	0	1	0	NA	3	1	Subpop.3
NSL365799	-0.0163	-0.0109	0.0022	0.0357	0.9621	0	NA	3	0.9621	Subpop.3
NSL365759	-0.0008	-0.0229	0.0275	0.3473	0.6022	0.0231	NA	3	0.6022	Admixed
PI660632	-0.0488	0.0126	0.8283	0.02	0.1517	0	NA	1	0.8283	Subpop.1
PI329311	0.0336	-0.0725	0	1	0	0	NA	2	1	Subpop.2
PI291239	0.0177	-0.0635	0.0007	0.895	0.1043	0	Durra	2	0.895	Subpop.2
NSL55743	0.0231	-0.071	0	1	0	0	NA	2	1	Subpop.2
NSL360555	-0.0274	0.0036	0.1674	0.0118	0.8209	0	NA	3	0.8209	Subpop.3
NSL51962	-0.0184	-0.01	0.0731	0.0614	0.8654	0	NA	3	0.8654	Subpop.3
PI660631	-0.0395	0.0053	0.5242	0.0095	0.4663	0	Guinea	1	0.5242	Admixed
PI148101	0.0297	-0.0628	0	1	0	0	Durra	2	1	Subpop.2
PI155138	-0.0289	0.0013	0.1176	0	0.8824	0	NA	3	0.8824	Subpop.3
PI147838	0.0838	0.0855	0	0	0	1	Durra	4	1	Subpop.4
NSL51876	-0.0175	-0.0095	0.112	0	0.8879	0	NA	3	0.8879	Subpop.3
PI660630	-0.0454	0.0111	0.4937	0	0.5063	0	NA	3	0.5063	Admixed
PI282835	-0.0185	-0.0088	0	0.0099	0.9901	0	NA	3	0.9901	Subpop.3
PI660603	-0.0383	0.009	0.4842	0	0.5157	0	NA	3	0.5157	Admixed
PI276770	0.0578	0.0199	0	0.4086	0	0.5914	Durra	4	0.5914	Admixed
PI285043	-0.0389	0.0072	0.5951	0	0.4049	0	Guinea	1	0.5951	Admixed
PI524948	-0.0291	-0.0005	0.0672	0	0.9328	0	Kafir	3	0.9328	Subpop.3
PI153824	-0.018	-0.0059	0	0.0316	0.9684	0	Caudatum	3	0.9684	Subpop.3
PI221651	-0.0615	0.029	1	0	0	0	Guinea	1	1	Subpop.1
NSL360526	-0.0368	0.0126	1	0	0	0	NA	1	1	Subpop.1
PI525049	-0.0315	-0.0008	0	0	1	0	NA	3	1	Subpop.3
NSL55731	0.0247	-0.0787	0	1	0	0	Durra	2	1	Subpop.2
NSL50717	-0.0282	0.0133	1	0	0	0	NA	1	1	Subpop.1
PI276830	0.0734	0.0737	0	0	0	1	Durra	4	1	Subpop.4
PI651106	-0.0159	-0.0064	0.1674	0	0.8326	0	NA	3	0.8326	Subpop.3
NSL55704	-0.0496	0.0253	1	0	0	0	NA	1	1	Subpop.1
PI148114	0.0177	-0.0432	0	0.7879	0.2121	0	Durra	2	0.7879	Admixed
PI221657	-0.0213	-0.0108	0	0	1	0	NA	3	1	Subpop.3
PI155329	-0.0253	-0.0014	0	0	1	0	NA	3	1	Subpop.3
NSL52251	-0.0018	-0.0346	0	0.3963	0.6037	0	NA	3	0.6037	Admixed
PI276787	0.0737	0.0733	0	0	0.0012	0.9988	Durra	4	0.9988	Subpop.4
NSL55698	0.0172	-0.0511	0	1	0	0	NA	2	1	Subpop.2
NSL54705	0.02	-0.0627	0	1	0	0	NA	2	1	Subpop.2
PI330734	0.0774	0.08	0	0	0	1	NA	4	1	Subpop.4
PI330098	0.0208	-0.0473	0	0.9086	0.0711	0.0203	Durra	2	0.9086	Subpop.2
PI152727	0.0213	0.0341	0	0.0158	0.5101	0.4741	NA	3	0.5101	Admixed
NSL50733	-0.0407	0.0181	1	0	0	0	NA	1	1	Subpop.1
PI248317	0.025	-0.0795	0	1	0	0	Durra	2	1	Subpop.2
PI522129	-0.0185	0.0179	0.5286	0.0488	0.2559	0.1668	NA	1	0.5286	Admixed
NSL51200	0.052	0.0586	0	0	0	1	NA	4	1	Subpop.4
PI330897	0.0146	-0.0389	0	0.6429	0.3571	0	Durra	2	0.6429	Admixed
NSL51780	-0.0122	-0.0052	0	0	1	0	NA	3	1	Subpop.3
PI525059	-0.0094	-0.0051	0.0088	0	0.9912	0	Caudatum	3	0.9912	Subpop.3
NSL54542	-0.0222	-0.0019	0	0	1	0	NA	3	1	Subpop.3
PI221625	-0.0433	0.0125	0.3944	0	0.6056	0	NA	3	0.6056	Admixed
NSL55669	0.0235	-0.0702	0	1	0	0	NA	2	1	Subpop.2
PI148093	0.0153	-0.0376	0	1	0	0	NA	2	1	Subpop.2
NSL50401	-0.0171	-0.0166	0	0	1	0	NA	3	1	Subpop.3
NSL51958	-0.0668	0.0278	0.9669	0	0.0331	0	NA	1	0.9669	Subpop.1
PI651124	-0.0658	0.0332	1	0	0	0	Guinea	1	1	Subpop.1
NSL50937	-0.0366	0.0137	0.894	0	0.106	0	NA	1	0.894	Subpop.1
NSL55730	0.0215	-0.0736	0	1	0	0	NA	2	1	Subpop.2
PI563006	-0.0322	0.0143	1	0	0	0	Guinea	1	1	Subpop.1
PI152591	-0.0074	-0.0151	0	0.1866	0.8129	0.0005	NA	3	0.8129	Subpop.3
PI660620	-0.0161	-0.0102	0	0	1	0	NA	3	1	Subpop.3
NSL51678	-0.0282	0.0051	0.0455	0	0.9545	0	NA	3	0.9545	Subpop.3
NSL50464	-0.0361	0.0132	0.9973	0.0027	0	0	Guinea	1	0.9973	Subpop.1
PI330894	0.0246	-0.0578	0	0.9723	0.0277	0	NA	2	0.9723	Subpop.2
PI660606	-0.0162	-0.012	0	0	1	0	Caudatum	3	1	Subpop.3
PI267542	-0.0497	0.0166	0.8468	0	0.1532	0	Guinea	1	0.8468	Subpop.1
PI267614	-0.0283	0.0071	0.8567	0	0.1433	0	Guinea	1	0.8567	Subpop.1
PI329836	-0.0069	-0.0081	0	0.113	0.887	0	Caudatum	3	0.887	Subpop.3
PI148089	0.029	-0.0655	0	1	0	0	Durra	2	1	Subpop.2
PI276803	0.0219	0.0409	0.247	0	0.1412	0.6118	Durra	4	0.6118	Admixed
NSL52312	-0.0092	0.0094	0.0317	0	0.8255	0.1427	NA	3	0.8255	Subpop.3
NSL55523	0.0119	-0.0395	0	1	0	0	NA	2	1	Subpop.2
PI153852	-0.0198	-0.008	0	0.0263	0.9737	0	Caudatum	3	0.9737	Subpop.3
NSL50499	-0.0617	0.0273	0.9685	0	0.0314	0	Guinea	1	0.9685	Subpop.1
NSL54962	0.0118	-0.0377	0	1	0	0	NA	2	1	Subpop.2
PI285041	-0.0445	0.0099	0.7059	0.0444	0.2497	0	NA	1	0.7059	Admixed
NSL50595	-0.0692	0.033	1	0	0	0	NA	1	1	Subpop.1
NSL365712	0.0088	-0.0276	0.0249	0.8618	0.1134	0	Durra	2	0.8618	Subpop.2
NSL55670	0.0213	-0.0647	0	0.9825	0.0175	0	NA	2	0.9825	Subpop.2
PI153860	-0.0157	-0.0032	0.0107	0	0.9892	0	Caudatum	3	0.9892	Subpop.3
NSL51902	-0.0272	0.0004	0.2682	0	0.7318	0	Caudatum	3	0.7318	Admixed
PI329915	0.0546	0.0275	0	0.3507	0.0191	0.6301	Durra	4	0.6301	Admixed
PI276792	0.03	-0.0109	0	0.6524	0	0.3476	NA	2	0.6524	Admixed
NSL55842	0.0337	0.039	0	0	0	1	NA	4	1	Subpop.4
NSL55714	0.0138	-0.0432	0	1	0	0	NA	2	1	Subpop.2
PI276789	0.0696	0.074	0	0	0	1	Durra	4	1	Subpop.4
NSL51982	-0.0541	0.0196	0.7955	0.0309	0.1736	0	NA	1	0.7955	Admixed
PI329597	0.018	-0.0422	0	1	0	0	Durra	2	1	Subpop.2
PI282857	-0.064	0.03	1	0	0	0	Guinea	1	1	Subpop.1
PI156034	-0.0182	-0.0048	0	0	1	0	NA	3	1	Subpop.3
NSL55744	0.0175	-0.0543	0	1	0	0	NA	2	1	Subpop.2
PI276788	0.0396	0.0404	0	0	0	1	NA	4	1	Subpop.4
PI276773	0.0773	0.0714	0	0.044	0	0.9559	Durra	4	0.9559	Subpop.4
PI276818	0.0271	-0.0653	0	1	0	0	NA	2	1	Subpop.2
NSL50716	-0.0608	0.0316	1	0	0	0	Guinea	1	1	Subpop.1
NSL52282	-0.0206	-0.0181	0	0	1	0	Kafir	3	1	Subpop.3
NSL54222	-0.0437	0.0101	0.8173	0	0.1827	0	Guinea	1	0.8173	Subpop.1
PI147937	0.0605	0.0691	0	0	0	1	Durra	4	1	Subpop.4
PI152856	-0.0162	-0.0058	0.0216	0.0449	0.9213	0.0122	NA	3	0.9213	Subpop.3
NSL54892	0.0186	-0.0661	0	1	0	0	NA	2	1	Subpop.2
PI660602	-0.0436	0.0099	0.8081	0	0.1919	0	Guinea	1	0.8081	Subpop.1
PI651168	-0.0409	0.0197	1	0	0	0	Durra	1	1	Subpop.1
NSL54184	0.0007	-0.0253	0	0.4357	0.5642	0	Guinea	3	0.5642	Admixed
PI651113	-0.0393	0.0169	1	0	0	0	Guinea	1	1	Subpop.1
PI329719	0.027	-0.0552	0	0.8825	0.1175	0	Durra	2	0.8825	Subpop.2
NSL50414	-0.0115	-0.0099	0	0.0673	0.9327	0	NA	3	0.9327	Subpop.3
NSL50721	-0.059	0.0295	1	0	0	0	NA	1	1	Subpop.1
NSL55749	-0.0241	0.0007	0	0	1	0	Caudatum	3	1	Subpop.3
NSL55032	0.014	-0.0431	0	1	0	0	Durra	2	1	Subpop.2
NSL51959	-0.0268	-0.0057	0.2241	0.0702	0.7057	0	Caudatum	3	0.7057	Admixed
PI291240	0.0206	-0.0724	0.0164	0.9836	0	0	Durra	2	0.9836	Subpop.2
PI571022	-0.0065	-0.0054	0.0012	0.0479	0.9509	0	Caudatum	3	0.9509	Subpop.3
PI276806	0.0155	-0.0364	0	1	0	0	Durra	2	1	Subpop.2
PI562995	-0.0729	0.0337	1	0	0	0	NA	1	1	Subpop.1
PI248318	0.0244	-0.0696	0	0.9891	0	0.0109	NA	2	0.9891	Subpop.2
NSL50449	-0.0477	0.0154	0.4579	0	0.5421	0	Guinea	3	0.5421	Admixed
NSL54236	-0.0378	0.0172	1	0	0	0	Guinea	1	1	Subpop.1
NSL50630	-0.0295	0.0143	1	0	0	0	NA	1	1	Subpop.1
PI153844	-0.025	0.0011	0.0038	0	0.9962	0	Caudatum	3	0.9962	Subpop.3
PI563023	-0.0608	0.0246	0.998	0	0.002	0	Guinea	1	0.998	Subpop.1
NSL54318	-0.0235	0.0069	0.9239	0.0761	0	0	Guinea	1	0.9239	Subpop.1
NSL51358	-0.0177	-0.0205	0	0.0594	0.9405	0	NA	3	0.9405	Subpop.3
NSL50634	-0.0696	0.0343	1	0	0	0	NA	1	1	Subpop.1
NSL55725	0.0157	-0.05	0	1	0	0	Durra	2	1	Subpop.2
PI505730	-0.0192	-0.0009	0	0	1	0	NA	3	1	Subpop.3
PI505740	-0.0145	-0.0007	0	0	1	0	NA	3	1	Subpop.3
NSL55685	0.0231	-0.0729	0	1	0	0	NA	2	1	Subpop.2
NSL50649	-0.0669	0.0337	1	0	0	0	Guinea	1	1	Subpop.1
PI647747	-0.0213	-0.008	0	0	1	0	NA	3	1	Subpop.3
PI297171	-0.0295	-0.0015	0	0	1	0	NA	3	1	Subpop.3
PI506058	-0.0289	0.0138	1	0	0	0	NA	1	1	Subpop.1
PI651178	-0.0548	0.0247	1	0	0	0	Guinea	1	1	Subpop.1
NSL55713	0.0241	-0.0744	0	1	0	0	NA	2	1	Subpop.2
NSL51969	0.0158	0.0224	0.0702	0.0569	0.5389	0.3339	Caudatum	3	0.5389	Admixed
NSL54162	-0.0468	0.0138	0.8413	0.034	0.1247	0	Guinea	1	0.8413	Subpop.1
NSL54818	0.0218	-0.067	0	1	0	0	NA	2	1	Subpop.2
PI276801	-0.017	-0.0069	0	0	1	0	Caudatum	3	1	Subpop.3
NSL55745	0.0148	-0.0405	0	1	0	0	NA	2	1	Subpop.2
NSL50613	-0.0696	0.0364	1	0	0	0	Guinea	1	1	Subpop.1
PI505737	-0.0245	0.0016	0	0	1	0	NA	3	1	Subpop.3
NSL50748	-0.0512	0.0213	0.8291	0	0.1709	0	Guinea	1	0.8291	Subpop.1
NSL54233	-0.0299	0.0059	0.5538	0.1096	0.322	0.0146	NA	1	0.5538	Admixed
NSL50827	-0.0624	0.0315	1	0	0	0	NA	1	1	Subpop.1
PI330070	0.073	0.0748	0	0	0	1	Durra	4	1	Subpop.4
NSL50650	-0.0452	0.0233	1	0	0	0	NA	1	1	Subpop.1
NSL50797	-0.0452	0.0237	1	0	0	0	NA	1	1	Subpop.1
PI570969	-0.0205	-0.0109	0.0007	0.0665	0.9328	0	Caudatum	3	0.9328	Subpop.3
NSL54662	0.02	-0.07	0	0.9261	0.0739	0	NA	2	0.9261	Subpop.2
NSL365693	-0.0216	-0.0073	0.0876	0	0.9124	0	NA	3	0.9124	Subpop.3
NSL50971	-0.0654	0.0275	0.9818	0	0.0182	0	NA	1	0.9818	Subpop.1
PI285039	-0.0268	-0.0061	0.2347	0.0383	0.7269	0	Caudatum	3	0.7269	Admixed
NSL52286	-0.0166	-0.0208	0	0.0791	0.9209	0	NA	3	0.9209	Subpop.3
NSL50663	-0.0663	0.0343	1	0	0	0	Guinea	1	1	Subpop.1
NSL50989	-0.0401	0.0262	0.3924	0	0.5429	0.0647	NA	3	0.5429	Admixed
PI570708	-0.0177	-0.0084	0	0	0.9988	0.0012	NA	3	0.9988	Subpop.3
NSL55706	0.0237	-0.0707	0	1	0	0	NA	2	1	Subpop.2
PI651167	-0.0556	0.0311	0.9262	0	0.0738	0	Guinea	1	0.9262	Subpop.1
NSL50603	-0.0477	0.0247	1	0	0	0	NA	1	1	Subpop.1
PI660601	-0.0445	0.0122	0.8185	0.0515	0.13	0	Guinea	1	0.8185	Subpop.1
PI276772	0.0616	0.0325	0	0.3452	0	0.6548	NA	4	0.6548	Admixed
PI570916	-0.0097	-0.0054	0	0.0997	0.9003	0	Caudatum	3	0.9003	Subpop.3
NSL51961	-0.0191	-0.0081	0.1657	0.0903	0.7439	0	NA	3	0.7439	Admixed
PI647733	-0.0273	-0.0162	0	0	1	0	NA	3	1	Subpop.3
PI522160	-0.0158	-0.0131	0.0033	0.0851	0.9116	0	NA	3	0.9116	Subpop.3
PI276785	0.0248	-0.0565	0	1	0	0	Durra	2	1	Subpop.2
NSL54165	-0.0545	0.0234	0.9998	0.0002	0	0	Guinea	1	0.9998	Subpop.1
NSL67916	0.0238	-0.0717	0	1	0	0	Durra	2	1	Subpop.2
NSL54877	0.0131	-0.047	0	0.9738	0.0262	0	NA	2	0.9738	Subpop.2
NSL56134	-0.0226	-0.0018	0	0	1	0	NA	3	1	Subpop.3
NSL51016	-0.0487	0.0224	1	0	0	0	NA	1	1	Subpop.1
PI506122	-0.01	-0.0083	0.4439	0.4445	0.1114	0.0003	NA	2	0.4445	Admixed
PI276823	0.0507	0.0124	0	0.4878	0	0.5122	Durra	4	0.5122	Admixed
PI152728	0.0057	-0.0248	0.0397	0.4789	0.4814	0	Durra	3	0.4814	Admixed
PI651102	-0.0284	-0.0015	0	0	1	0	Kafir	3	1	Subpop.3
PI571020	0.0025	-0.0411	0	0.4835	0.5165	0	Durra	3	0.5165	Admixed
NSL51978	-0.0619	0.0253	0.9285	0	0.0715	0	NA	1	0.9285	Subpop.1
NSL55711	0.0256	-0.0776	0	1	0	0	NA	2	1	Subpop.2
NSL55350	0.0187	-0.0584	0	0.8756	0.1244	0	NA	2	0.8756	Subpop.2
PI329323	0.0593	0.0594	0	0	0	1	NA	4	1	Subpop.4
NSL54878	0.0191	-0.0686	0	0.9436	0.0564	0	NA	2	0.9436	Subpop.2
PI505705	-0.0318	0.0021	0.114	0	0.886	0	Kafir	3	0.886	Subpop.3
NSL55671	0.017	-0.0556	0	0.8883	0.1117	0	Durra	2	0.8883	Subpop.2
PI148086	0.0271	-0.0632	0	1	0	0	Durra	2	1	Subpop.2
PI152731	-0.0162	-0.0111	0	0	1	0	NA	3	1	Subpop.3
PI508366	-0.0672	0.0299	0.9897	0	0.0103	0	NA	1	0.9897	Subpop.1
PI152733	-0.0184	-0.0097	0	0	1	0	NA	3	1	Subpop.3
PI647716	-0.067	0.0324	1	0	0	0	NA	1	1	Subpop.1
NSL50579	-0.0444	0.0218	1	0	0	0	NA	1	1	Subpop.1
NSL55843	0.0227	-0.0713	0	1	0	0	NA	2	1	Subpop.2
NSL80235	-0.0439	0.0205	1	0	0	0	NA	1	1	Subpop.1
NSL52261	-0.0142	-0.0163	0	0.0474	0.9526	0	NA	3	0.9526	Subpop.3
NSL67920	0.0267	-0.0851	0	1	0	0	NA	2	1	Subpop.2
PI330165	0.0293	-0.0701	0	1	0	0	NA	2	1	Subpop.2
PI647745	0.0112	-0.0412	0	0.7762	0.2238	0	Durra	2	0.7762	Admixed
NSL52295	-0.0162	-0.0217	0	0.0936	0.9064	0	NA	3	0.9064	Subpop.3
NSL51693	-0.0145	-0.0032	0	0	0.9806	0.0194	NA	3	0.9806	Subpop.3
NSL54114	-0.0396	0.0158	0.9938	0.0062	0	0	Guinea	1	0.9938	Subpop.1
NSL54224	-0.0519	0.0168	0.9344	0.0656	0	0	NA	1	0.9344	Subpop.1
PI586792	-0.0124	-0.0111	0.0028	0	0.9972	0	Caudatum	3	0.9972	Subpop.3
NSL54577	0.0049	-0.0198	0.0359	0.4975	0.4314	0.0352	Durra	2	0.4975	Admixed
NSL51981	-0.0474	0.0161	0.7085	0	0.2915	0	Guinea	1	0.7085	Admixed
NSL55048	0.0135	-0.0424	0.0191	0.9202	0.0607	0	NA	2	0.9202	Subpop.2
PI570928	-0.0052	-0.0086	0	0.1954	0.7795	0.0252	Caudatum	3	0.7795	Admixed
NSL54111	-0.0324	0.0083	0.7319	0	0.2681	0	NA	1	0.7319	Admixed
NSL54635	-0.006	-0.0316	0.0021	0.3353	0.6625	0	NA	3	0.6625	Admixed
NSL55700	0.0235	-0.0712	0	1	0	0	NA	2	1	Subpop.2
NSL50374	-0.018	-0.0217	0	0.0821	0.9179	0	NA	3	0.9179	Subpop.3
PI570813	0.007	-0.0437	0	0.5482	0.4518	0	Durra	2	0.5482	Admixed
PI651131	-0.0654	0.0345	1	0	0	0	Guinea	1	1	Subpop.1
NSL51825	-0.0204	-0.0086	0	0	1	0	NA	3	1	Subpop.3
NSL67918	0.0132	-0.0438	0	0.9675	0.0325	0	NA	2	0.9675	Subpop.2
PI267580	0.0719	0.0789	0	0	0	1	NA	4	1	Subpop.4
PI276800	0.071	0.074	0.0071	0.0289	0	0.9641	Durra	4	0.9641	Subpop.4
NSL51039	-0.0243	0.0246	0.5188	0	0.3122	0.1689	NA	1	0.5188	Admixed
NSL54178	-0.0623	0.0278	1	0	0	0	NA	1	1	Subpop.1
NSL54977	0.0152	-0.0584	0	0.7775	0.2225	0	NA	2	0.7775	Admixed
NSL54221	-0.0332	0.0101	0.9041	0.0959	0	0	Guinea	1	0.9041	Subpop.1
PI609612	-0.0326	0.0295	0.4548	0.0537	0.3451	0.1464	Bicolor (outlier)	1	0.4548	Admixed
NSL51234	-0.0211	-0.0003	0	0	1	0	NA	3	1	Subpop.3
PI276820	0.0433	0.0268	0	0.2908	0	0.7092	Durra	4	0.7092	Admixed
NSL50448	-0.069	0.0348	1	0	0	0	Guinea	1	1	Subpop.1
PI651187	-0.0528	0.0236	0.9787	0	0.0213	0	Guinea	1	0.9787	Subpop.1
PI505741	-0.0145	0.0008	0	0	1	0	NA	3	1	Subpop.3
NSL365720	-0.0351	0.0029	0.4354	0.0434	0.5212	0	NA	3	0.5212	Admixed
NSL52006	-0.0542	0.0248	0.8398	0.0013	0.1589	0	NA	1	0.8398	Subpop.1
PI660566	-0.0617	0.0299	1	0	0	0	Guinea	1	1	Subpop.1
NSL55712	0.0169	-0.0548	0	1	0	0	NA	2	1	Subpop.2
NSL54144	-0.0414	0.0101	0.7716	0.0277	0.2007	0	NA	1	0.7716	Admixed
NSL54588	-0.0189	-0.0218	0	0.0607	0.9393	0	NA	3	0.9393	Subpop.3
NSL67921	0.0255	-0.0809	0	1	0	0	Durra	2	1	Subpop.2
NSL55476	0.0178	-0.0499	0	0.8857	0.1143	0	NA	2	0.8857	Subpop.2
PI154987	-0.0219	-0.0087	0	0	1	0	NA	3	1	Subpop.3
NSL54212	0.0135	-0.0464	0	1	0	0	NA	2	1	Subpop.2
PI267643	0.0783	0.0693	0	0.0673	0	0.9327	Durra	4	0.9327	Subpop.4
NSL50620	-0.0619	0.0317	1	0	0	0	NA	1	1	Subpop.1
NSL365683	-0.0073	-0.0097	0	0.0898	0.9101	0	NA	3	0.9101	Subpop.3
PI155885	-0.023	-0.0079	0	0	1	0	NA	3	1	Subpop.3
PI291231	0.0185	-0.0632	0	1	0	0	Durra	2	1	Subpop.2
NSL50409	-0.0194	-0.0184	0	0.0251	0.9749	0	NA	3	0.9749	Subpop.3
PI196049	0.0239	-0.0508	0	1	0	0	Durra	2	1	Subpop.2
PI152654	-0.0071	-0.0098	0.0208	0	0.9394	0.0397	NA	3	0.9394	Subpop.3
PI156217	-0.0201	0.0005	0	0	1	0	Caudatum	3	1	Subpop.3
PI156393	-0.0206	0.0052	0.0724	0	0.9266	0.001	NA	3	0.9266	Subpop.3
PI273465	-0.0182	0.0088	0.602	0.1501	0.1559	0.0919	NA	1	0.602	Admixed
PI156463	-0.0109	-0.0053	0	0	1	0	Caudatum	3	1	Subpop.3
PI591377	-0.0117	-0.0166	0	0.1499	0.8501	0	NA	3	0.8501	Subpop.3
NSL52176	-0.0451	0.0213	0.9657	0	0.0343	0	NA	1	0.9657	Subpop.1
PI154846	-0.0187	0.0024	0.0013	0	0.9987	0	NA	3	0.9987	Subpop.3
PI156268	0.0206	-0.0375	0	0.7735	0.1587	0.0678	NA	2	0.7735	Admixed
PI330886	0.0208	-0.0396	0	0.9618	0	0.0382	Durra	2	0.9618	Subpop.2
NSL55719	0.0187	-0.0544	0	1	0	0	NA	2	1	Subpop.2
NSL54142	-0.0359	0.0115	0.8477	0.0605	0.0918	0	NA	1	0.8477	Subpop.1
NSL51949	-0.008	-0.0031	0.0961	0	0.9039	0	NA	3	0.9039	Subpop.3
NSL54231	-0.0331	0.0106	0.649	0	0.351	0	NA	1	0.649	Admixed
NSL50685	-0.0527	0.0276	1	0	0	0	Guinea	1	1	Subpop.1
PI383856	-0.0154	-0.0015	0	0	1	0	Caudatum	3	1	Subpop.3
